# Supplementary material for: Sustaining the collaborative chronic care model in outpatient mental health: a matrixed multiple case study
Source: Springer Nature journal article supplement (doi:10.1186/s13012-024-01342-2), 2024-02-19
Supplement: MOESM2 [file 26749594]

**Additional File 2.** Data input, tasks performed, and analysis output for MMCS Steps 5 through 9.

| <b><i>MMCS step</i></b>                                                                                | <b><i>Data input</i></b>                                                                                                                         | <b><i>Tasks performed</i></b>                                                                                                                                                                                                                                                                                                                              | <b><i>Analysis output</i></b>                                                                                                                                                                                                             |
|--------------------------------------------------------------------------------------------------------|--------------------------------------------------------------------------------------------------------------------------------------------------|------------------------------------------------------------------------------------------------------------------------------------------------------------------------------------------------------------------------------------------------------------------------------------------------------------------------------------------------------------|-------------------------------------------------------------------------------------------------------------------------------------------------------------------------------------------------------------------------------------------|
| <b>5. Assessed sustainability per site</b>                                                             | <ul style="list-style-type: none"> <li>• CCM-coded interview data</li> </ul>                                                                     | <ul style="list-style-type: none"> <li>• Generated CCM code summaries per site</li> <li>• Reached consensus on whether each site exhibited high, medium, or low sustainability</li> </ul>                                                                                                                                                                  | <ul style="list-style-type: none"> <li>• Assignment of high/medium/low sustainability level to each of the 9 sites: 3 high, 3 medium, and 3 low</li> </ul>                                                                                |
| <b>6. Identified influencing factors per site</b>                                                      | <ul style="list-style-type: none"> <li>• i-PARIHS-coded interview data</li> </ul>                                                                | <ul style="list-style-type: none"> <li>• Generated i-PARIHS code summaries per site, including descriptions of factors deemed relevant to each summary</li> <li>• Reached consensus on identified factors per site and a consolidated list of identified factors across all the sites</li> </ul>                                                           | <ul style="list-style-type: none"> <li>• Designation of relevant factors for each of the 9 sites</li> <li>• List of 25 factors under the i-PARIHS domains of Innovation (6), Recipients (6), Context (8), and Facilitation (5)</li> </ul> |
| <b>7. Organized the assessed sustainability and identified factors per site into a sortable matrix</b> | <ul style="list-style-type: none"> <li>• CCM sustainability assessed per site</li> <li>• i-PARIHS-aligned factors identified per site</li> </ul> | <ul style="list-style-type: none"> <li>• Arranged the data into a matrix using Microsoft Excel: factors on rows, sustainability on columns, and sites on sheets</li> </ul>                                                                                                                                                                                 | <ul style="list-style-type: none"> <li>• Matrix of 25 rows (factors), 3 columns (sustainability), and 9 sheets (sites) that is sortable and filterable</li> </ul>                                                                         |
| <b>8. Conducted within-site analysis of the matrixed data</b>                                          | <ul style="list-style-type: none"> <li>• Each site-specific sheet of the matrix</li> </ul>                                                       | <ul style="list-style-type: none"> <li>• Examined the data on each factor per site</li> <li>• Reached consensus on whether the factor was present, somewhat present, or minimally present at the site</li> <li>• Reached consensus on whether the factor had an enabling, hindering, or neutral/unclear influence on sustainability at the site</li> </ul> | <ul style="list-style-type: none"> <li>• Designation (and insertion into the matrix) of the presence and influence of each of the 25 factors for each of the 9 sites</li> </ul>                                                           |

|                                                                     |                                                                                                                                                                                |                                                                                                                                                                                                                                                                                                                                                                                                                                                                                                     |                                                                                                                                                                                                                                                                                                               |
|---------------------------------------------------------------------|--------------------------------------------------------------------------------------------------------------------------------------------------------------------------------|-----------------------------------------------------------------------------------------------------------------------------------------------------------------------------------------------------------------------------------------------------------------------------------------------------------------------------------------------------------------------------------------------------------------------------------------------------------------------------------------------------|---------------------------------------------------------------------------------------------------------------------------------------------------------------------------------------------------------------------------------------------------------------------------------------------------------------|
| <p><b>9. Conducted cross-site analysis of the matrixed data</b></p> | <ul style="list-style-type: none"> <li>Matrix with presence and influence specification for each factor per site, with the sheets (sites) ordered by sustainability</li> </ul> | <ul style="list-style-type: none"> <li>Assessed whether factors and their combinations were (i) present across multiple sites, (ii) consistently associated with higher or lower sustainability, and (iii) emphasized at some sites more than others</li> <li>Regarded a factor or a combination of factors as being associated with high/medium/low sustainability if it was identified at a majority (i.e., even if not all) of the sites designated as high/medium/low sustainability</li> </ul> | <ul style="list-style-type: none"> <li>11 factors (and no combinations of factors' presence and influence) identified for at least 2 sites within a group of high/medium/low sustainability sites, under the i-PARIHS domains of Innovation (1), Recipients (4), Context (4), and Facilitation (2)</li> </ul> |
|---------------------------------------------------------------------|--------------------------------------------------------------------------------------------------------------------------------------------------------------------------------|-----------------------------------------------------------------------------------------------------------------------------------------------------------------------------------------------------------------------------------------------------------------------------------------------------------------------------------------------------------------------------------------------------------------------------------------------------------------------------------------------------|---------------------------------------------------------------------------------------------------------------------------------------------------------------------------------------------------------------------------------------------------------------------------------------------------------------|

CCM: Collaborative Chronic Care Model

i-PARIHS: Integrated Promoting Action on Research Implementation in Health Services

MMCS: Matrixed Multiple Case Study
